# Supplementary material for: Uranyl (UO22+) structuring and dynamics at graphene/electrolyte interface
Source: Royal Society of Chemistry journal article supplement (doi:10.1039/d4cp02108h), 2024-01-01
Supplement: d4cp02108h1.pdf [file d4cp02108h1.pdf]

**Supplementary Information for: Uranyl ( $\text{UO}_2^{2+}$ )  
Structuring and Dynamics at  
Graphene/Electrolyte Interface**

Nitesh Kumar\*

*Department of Chemistry, Washington State University, Pullman, Washington, 99163,  
United States*

E-mail: [nitesh.kumar@wsu.edu](mailto:nitesh.kumar@wsu.edu), [kmnitesh05@gmail.com](mailto:kmnitesh05@gmail.com)

## List of Figures

- S1 (Left Panel) Normalized density profiles of water along  $z$  axis for systems with graphene modeled using amber99 and charmm36 force fields. (Right Panel) The normalized density of uranyl in the interfacial region **I** ( $z = 0-8 \text{ \AA}$ ) at various ECC values in the system with 1.06 M  $\text{UO}_2(\text{NO}_3)_2$  and 1.41 M  $\text{LiNO}_3$ . S3
- S2 Number density of  $[\text{Li}(\text{NO}_3)_n]^{1-n}$  ( $n = 0-1$ ) complexes along the  $z$  axis. . . S5

## List of Tables

- S1 Average residence times of uranyl as a function of the distance from the graphene surface. Residence times were computed using bin widths of 2  $\text{\AA}$ . . S5

## Contents

|                           |    |
|---------------------------|----|
| List of Figures           | S2 |
| List of Tables            | S2 |
| Force Fields Benchmarking | S3 |
| References                | S6 |

## Force Fields Benchmarking

To probe the sensitivity of the uranyl adsorption (at the graphene surface) towards the ion charges, the ion ( $\text{UO}_2^{2+}$ ,  $\text{Li}^+$  and  $\text{NO}_3^-$ ) charges were scaled from 75% to 100% with an increment of 5%. The normalized density shows that uranyl adsorption is sensitive to the ion charges, however, a uranyl excess is observed at each  $q_i$  (at least 15 times relative to the bulk). Within this study, we used 90 % ECC, as it reproduces experimentally observed uranyl nitrate association constants in  $\text{LiNO}_3$  media.<sup>1</sup> The graphene layer was modeled using amber99<sup>2</sup> and charmm36<sup>3</sup> force fields. The water distribution near the graphene layer is used to compare the force fields. Both force fields showed a similar interaction of water with graphene (Figure S 1A). A similar distribution of water near the graphene surface is observed using ab-initio molecular dynamics simulations.<sup>4</sup> Therefore, Amber99 force fields were employed for the modeling of graphene in each system.

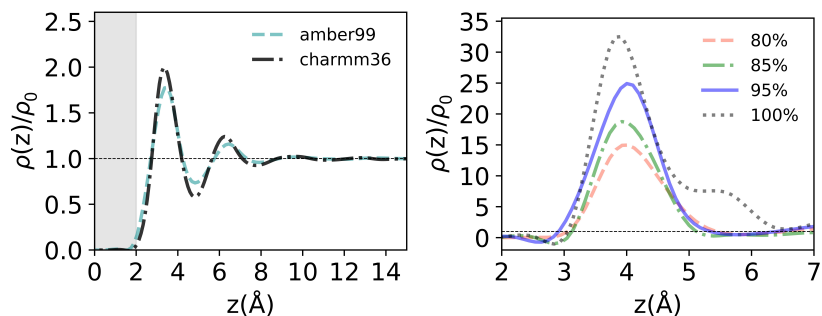

Figure S1: (Left Panel) Normalized density profiles of water along  $z$  axis for systems with graphene modeled using amber99 and charmm36 force fields. (Right Panel) The normalized density of uranyl in the interfacial region **I** ( $z = 0-8 \text{ \AA}$ ) at various ECC values in the system with 1.06 M  $\text{UO}_2(\text{NO}_3)_2$  and 1.41 M  $\text{LiNO}_3$ .

**Umbrella Sampling** The umbrella sampling methodology was employed to examine the thermodynamics of the ion-graphene interactions. Systems were prepared by inserting one  $\text{UO}_2^{2+}/\text{Li}^+$  ions into a orthogonal water/graphene box. Charges were neutralized by placing two & one  $\text{NO}_3^-$  ions in the system with  $\text{UO}_2^{2+}$  and  $\text{Li}^+$  respectively. Free energy calculations were performed with the GROMACS<sup>5</sup> software package patched with Plumed.<sup>6</sup> The  $z$  distance ( $d_z$ ) between ion and graphene center of mass (COM) was selected as a collective variable (CV) for generating the potential of mean forces (PMFs) with 0.2 nm sampling windows and 500 kcal/(mol nm<sup>2</sup>) harmonic restraint. An additional constraint was applied to keep the ion in a cylindrical space along the  $z$  axis ( $d_z$ ) to make the calculation faster. PMFs were generated using the weighted histogram analysis method (WHAM). Each sampling window was equilibrated in the NPT ensemble for 0.5 ns and the final production data were collected for 2.0 ns.

**Table S1: Average residence times of uranyl as a function of the distance from the graphene surface. Residence times were computed using bin widths of 2 Å.**

| Slab number | Slab range Å | $\tau$ (ps) |
|-------------|--------------|-------------|
| 1           | 3-5          | 587.196     |
| 2           | 5-7          | 22.808      |
| 3           | 7-9          | 19.585      |
| 4           | 9-11         | 20.945      |
| 5           | 11-13        | 8.563       |
| 6           | 13-15        | 8.863       |

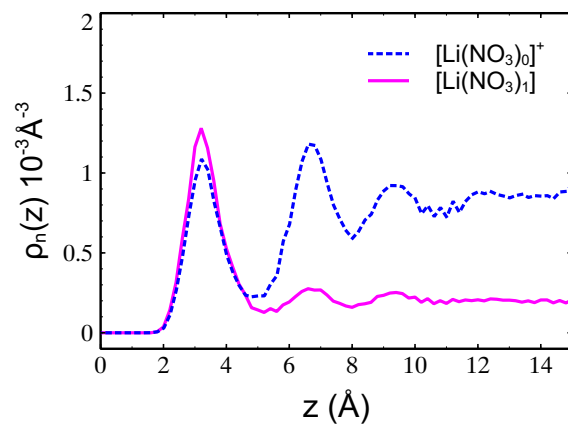

Figure S2: Number density of  $[\text{Li}(\text{NO}_3)_n]^{1-n}$  ( $n = 0-1$ ) complexes along the  $z$  axis.

## References

- (1) Kumar, N.; Servis, M. J.; Clark, A. E. Uranyl Speciation in the Presence of Specific Ion Gradients at the Electrolyte/Organic Interface. *Solvent Extraction and Ion Exchange* **2022**, *40*, 165–187.
- (2) Hornak, V.; Abel, R.; Okur, A.; Strockbine, B.; Roitberg, A.; Simmerling, C. Comparison of multiple Amber force fields and development of improved protein backbone parameters. *Proteins: Structure, Function, and Bioinformatics* **2006**, *65*, 712–725.
- (3) Vanommeslaeghe, K.; Hatcher, E.; Acharya, C.; Kundu, S.; Zhong, S.; Shim, J.; Darian, E.; Guvench, O.; Lopes, P.; Vorobyov, I. et al. CHARMM general force field: A force field for drug-like molecules compatible with the CHARMM all-atom additive biological force fields. *Journal of computational chemistry* **2010**, *31*, 671–690.
- (4) Chiang, K.-Y.; Seki, T.; Yu, C.-C.; Ohto, T.; Hunger, J.; Bonn, M.; Nagata, Y. The dielectric function profile across the water interface through surface-specific vibrational spectroscopy and simulations. **2022**,
- (5) Abraham, M.; Murtol, T.; Schulz, R.; Pall, S.; Smith, J.; Hess, B.; Lindhal, E. GRO-MACS: High performance molecular simulations through multi-level parallelism from laptops to supercomputers. *SoftwareX* **2015**, *1-2*, 19–25.
- (6) Tribello, G. A.; Bonomi, M.; Branduardi, D.; Camilloni, C.; Bussi, G. PLUMED 2: New feathers for an old bird. *Computer Physics Communications* **2014**, *185*, 604–613.
